# Supplementary material for: Adverse Events in Robotic Surgery: A Retrospective Study of 14 Years of FDA Data
Source: PubMed Central journal article supplement (PMC4838256; doi:10.1371/journal.pone.0151470), 2016-04-20
Supplement: pone.0151470.s008.pdf [file pone.0151470.s008.pdf]

**S4 Table. Example malfunctions and their patient impact during cardiothoracic procedures**

| <b>MAUDE Report No. (Year)</b> | <b>Surgery Type</b>              | <b>Event</b>                                                                                                                                                        | <b>Faulty Component</b>        | <b>Patient Impact</b>                                                                                                                         | <b>Recovery Actions</b>                                                                                                               |
|--------------------------------|----------------------------------|---------------------------------------------------------------------------------------------------------------------------------------------------------------------|--------------------------------|-----------------------------------------------------------------------------------------------------------------------------------------------|---------------------------------------------------------------------------------------------------------------------------------------|
| 932174 (2007)                  | Mitral valve repair              | Possibly port placement; The robotic arms were never seen to collide, but this could have occurred, resulting in pressure on the retractor.                         | N/A                            | Left atrial disrupted, A 3 cm tear occurred in the hood of atrium medial to left atrial appendage, extending down towards the mitral annulus. | A patch was brought into place, trimmed, sewn using a suture, and tied. Sternotomy incision made for further repair.                  |
| 1077464 (2008)                 | Beating heart double vessel CABG | Unexplained movement of the system arm with the endowrist stabilizer instrument attached to it. Feet at the distal end of the endowrist stabilizer tipped downward. | System arm                     | Damage to the myocardium of the patient's left ventricle.                                                                                     | Converted to open sternotomy and repaired.                                                                                            |
| 1590517 (2010)                 | CABG                             | Micro bipolar forceps (mbf) instrument jumped forward. When master tool manipulator was moved, the instrument felt stuck and then moved.                            | Patient side manipulator (psm) | Patient's artery punctured.                                                                                                                   | Damaged section of artery was transected and the healthy portion was used to complete the bypass. Company replaced the psm component. |
| 2494890 (2012)                 | CABG                             | Arcing from bipolar forceps instrument.                                                                                                                             | Forceps instrument             | Small burn to diaphragm.                                                                                                                      | Connected ground pads and checked electrical surgical unit.                                                                           |
| 2816230 (2012)                 | N/A                              | Patient-side manipulator (psm) arm 2 jumped.                                                                                                                        | Patient-side manipulator (psm) | The forceps instrument on the psm lacerated the patient's mammary artery.                                                                     | Converted to open surgery.                                                                                                            |
